# Supplementary material for: Syntheses, structures, luminescence and magnetic properties of eleven coordination polymers constructed by a N,N′-sulfuryldiimidazole ligand
Source: Royal Society of Chemistry journal article supplement (doi:10.1039/c5ce00807g), 2015-01-01
Supplement: c5ce00807g1.pdf [file c5ce00807g1.pdf]

*Supporting Information for*

Syntheses, structures, luminescence, and magnetic properties of  
eleven coordination polymers constructed by a N,N'-  
sulfuryldiimidazole ligand

*Kang Liu, Benhua Ma, Xiaolei Guo, Dingxuan Ma, Lingkun Meng, Guang Zeng, Fen Yang,  
Guanghua Li, Zhan Shi\* and Shouhua Feng*

*State Key Laboratory of Inorganic Synthesis and Preparative Chemistry, College of Chemistry, Jilin  
University, Changchun 130012, P. R. China*

E-mail: [zshi@mail.jlu.edu.cn](mailto:zshi@mail.jlu.edu.cn)

**Table S1.** Selected bond distances (Å) and angles (°) for **1**.

|                                |            |                                |           |
|--------------------------------|------------|--------------------------------|-----------|
| Zn(1)-N(4) <sup>#1</sup>       | 2.037(2)   | Zn(1)-N(1)                     | 2.041(2)  |
| Zn(1)-O(7)                     | 2.0734(19) | Zn(1)-O(3)                     | 2.136(2)  |
| Zn(1)-O(4)                     | 2.156(2)   | Zn(1)-O(9)                     | 2.457(2)  |
| N(4) <sup>#1</sup> -Zn(1)-N(1) | 106.65(9)  | N(4) <sup>#1</sup> -Zn(1)-O(7) | 149.18(9) |
| N(1)-Zn(1)-O(7)                | 104.11(9)  | N(4) <sup>#1</sup> -Zn(1)-O(3) | 89.36(9)  |
| N(1)-Zn(1)-O(3)                | 91.45(10)  | O(7)-Zn(1)-O(3)                | 87.97(8)  |
| N(4) <sup>#1</sup> -Zn(1)-O(4) | 94.51(9)   | N(1)-Zn(1)-O(4)                | 102.83(9) |
| O(7)-Zn(1)-O(4)                | 80.44(8)   | O(3)-Zn(1)-O(4)                | 163.40(9) |
| N(4) <sup>#1</sup> -Zn(1)-O(9) | 92.79(8)   | N(1)-Zn(1)-O(9)                | 159.77(8) |
| O(7)-Zn(1)-O(9)                | 56.41(7)   | O(3)-Zn(1)-O(9)                | 83.05(9)  |
| O(4)-Zn(1)-O(9)                | 80.65(8)   |                                |           |

Symmetry transformations used to generate equivalent atoms:

<sup>#1</sup> -x+1/2,-y+1/2,-z.**Table S2.** Selected bond distances (Å) and angles (°) for **2**.

|                                              |            |                                              |            |
|----------------------------------------------|------------|----------------------------------------------|------------|
| Zn(1)-N(1)                                   | 2.1237(13) | Zn(1)-N(1) <sup>#1</sup>                     | 2.1237(13) |
| Zn(1)-N(4) <sup>#2</sup>                     | 2.1477(15) | Zn(1)-N(4) <sup>#3</sup>                     | 2.1477(15) |
| Zn(1)-O(3)                                   | 2.1604(12) | Zn(1)-O(3) <sup>#1</sup>                     | 2.1604(12) |
| N(1)-Zn(1)-N(1) <sup>#1</sup>                | 180        | N(1)-Zn(1)-N(4) <sup>#2</sup>                | 89.18(5)   |
| N(1) <sup>#1</sup> -Zn(1)-N(4) <sup>#2</sup> | 90.82(5)   | N(1)-Zn(1)-N(4) <sup>#3</sup>                | 90.82(5)   |
| N(1) <sup>#1</sup> -Zn(1)-N(4) <sup>#3</sup> | 89.18(5)   | N(4) <sup>#2</sup> -Zn(1)-N(4) <sup>#3</sup> | 180        |
| N(1)-Zn(1)-O(3)                              | 85.98(5)   | N(1) <sup>#1</sup> -Zn(1)-O(3)               | 94.02(5)   |
| N(4) <sup>#2</sup> -Zn(1)-O(3)               | 92.53(5)   | N(4) <sup>#3</sup> -Zn(1)-O(3)               | 87.47(5)   |
| N(1)-Zn(1)-O(3) <sup>#1</sup>                | 94.02(5)   | N(1) <sup>#1</sup> -Zn(1)-O(3) <sup>#1</sup> | 85.98(5)   |
| N(4) <sup>#2</sup> -Zn(1)-O(3) <sup>#1</sup> | 87.47(5)   | N(4) <sup>#3</sup> -Zn(1)-O(3) <sup>#1</sup> | 92.53(5)   |
| O(3)-Zn(1)-O(3) <sup>#1</sup>                | 180        |                                              |            |

Symmetry transformations used to generate equivalent atoms:

<sup>#1</sup> -x+1,-y,-z+1; <sup>#2</sup> x,y-1,z; <sup>#3</sup> -x+1,-y+1,-z+1.**Table S3.** Selected bond distances (Å) and angles (°) for **3**.

|                                              |          |                                              |          |
|----------------------------------------------|----------|----------------------------------------------|----------|
| Co(1)-O(3)                                   | 2.127(2) | Co(1)-O(3) <sup>#1</sup>                     | 2.127(2) |
| Co(1)-N(1) <sup>#1</sup>                     | 2.131(2) | Co(1)-N(1)                                   | 2.131(2) |
| Co(1)-N(4) <sup>#2</sup>                     | 2.147(2) | Co(1)-N(4) <sup>#3</sup>                     | 2.147(2) |
| O(3)-Co(1)-O(3) <sup>#1</sup>                | 180      | O(3)-Co(1)-N(1) <sup>#1</sup>                | 86.17(8) |
| O(3) <sup>#1</sup> -Co(1)-N(1) <sup>#1</sup> | 93.83(8) | O(3)-Co(1)-N(1)                              | 93.83(8) |
| O(3) <sup>#1</sup> -Co(1)-N(1)               | 86.17(8) | N(1) <sup>#1</sup> -Co(1)-N(1)               | 180      |
| O(3)-Co(1)-N(4) <sup>#2</sup>                | 87.34(9) | O(3) <sup>#1</sup> -Co(1)-N(4) <sup>#2</sup> | 92.66(9) |
| N(1) <sup>#1</sup> -Co(1)-N(4) <sup>#2</sup> | 90.98(9) | N(1)-Co(1)-N(4) <sup>#2</sup>                | 89.02(9) |
| O(3)-Co(1)-N(4) <sup>#3</sup>                | 92.66(9) | O(3) <sup>#1</sup> -Co(1)-N(4) <sup>#3</sup> | 87.34(9) |

|                                              |          |                               |          |
|----------------------------------------------|----------|-------------------------------|----------|
| N(1) <sup>#1</sup> -Co(1)-N(4) <sup>#3</sup> | 89.02(9) | N(1)-Co(1)-N(4) <sup>#3</sup> | 90.98(9) |
| N(4) <sup>#2</sup> -Co(1)-N(4) <sup>#3</sup> | 180      |                               |          |

Symmetry transformations used to generate equivalent atoms:

<sup>#1</sup> -x+1,-y,-z+1; <sup>#2</sup> x,y-1,z; <sup>#3</sup> -x+1,-y+1,-z+1.

**Table S4.** Selected bond distances (Å) and angles (°) for **4**.

|                                              |            |                                              |            |
|----------------------------------------------|------------|----------------------------------------------|------------|
| Cu(1)-N(1)                                   | 2.012(2)   | Cu(1)-N(1) <sup>#1</sup>                     | 2.012(2)   |
| Cu(1)-N(4) <sup>#2</sup>                     | 2.035(2)   | Cu(1)-N(4) <sup>#3</sup>                     | 2.035(2)   |
| Cu(1)-O(3) <sup>#1</sup>                     | 2.3616(19) | Cu(1)-O(3)                                   | 2.3616(19) |
| N(1)-Cu(1)-N(1) <sup>#1</sup>                | 180        | N(1)-Cu(1)-N(4) <sup>#2</sup>                | 88.39(8)   |
| N(1) <sup>#1</sup> -Cu(1)-N(4) <sup>#2</sup> | 91.61(8)   | N(1)-Cu(1)-N(4) <sup>#3</sup>                | 91.61(8)   |
| N(1) <sup>#1</sup> -Cu(1)-N(4) <sup>#3</sup> | 88.39(8)   | N(4) <sup>#2</sup> -Cu(1)-N(4) <sup>#3</sup> | 180        |
| N(1)-Cu(1)-O(3) <sup>#1</sup>                | 90.76(8)   | N(1) <sup>#1</sup> -Cu(1)-O(3) <sup>#1</sup> | 89.24(8)   |
| N(4) <sup>#2</sup> -Cu(1)-O(3) <sup>#1</sup> | 82.14(8)   | N(4) <sup>#3</sup> -Cu(1)-O(3) <sup>#1</sup> | 97.86(8)   |
| N(1)-Cu(1)-O(3)                              | 89.24(8)   | N(1) <sup>#1</sup> -Cu(1)-O(3)               | 90.76(8)   |
| N(4) <sup>#2</sup> -Cu(1)-O(3)               | 97.86(8)   | N(4) <sup>#3</sup> -Cu(1)-O(3)               | 82.14(8)   |
| O(3) <sup>#1</sup> -Cu(1)-O(3)               | 180        |                                              |            |

Symmetry transformations used to generate equivalent atoms:

<sup>#1</sup> -x+1/2,-y+1/2,-z+1; <sup>#2</sup> x+1/2,-y+1/2,z+1/2; <sup>#3</sup> -x,y,-z+1/2.

**Table S5.** Selected bond distances (Å) and angles (°) for **5**.

|                                              |            |                                              |            |
|----------------------------------------------|------------|----------------------------------------------|------------|
| Mn(1)-O(3)                                   | 2.196(3)   | Mn(1)-O(3) <sup>#1</sup>                     | 2.196(3)   |
| Mn(1)-N(1)                                   | 2.246(3)   | Mn(1)-N(1) <sup>#1</sup>                     | 2.246(3)   |
| Mn(1)-N(4) <sup>#2</sup>                     | 2.262(3)   | Mn(1)-N(4) <sup>#3</sup>                     | 2.262(3)   |
| O(3)-Mn(1)-O(3) <sup>#1</sup>                | 87.71(19)  | O(3)-Mn(1)-N(1)                              | 92.19(12)  |
| O(3) <sup>#1</sup> -Mn(1)-N(1)               | 83.61(12)  | O(3)-Mn(1)-N(1) <sup>#1</sup>                | 83.61(12)  |
| O(3) <sup>#1</sup> -Mn(1)-N(1) <sup>#1</sup> | 92.19(13)  | N(1)-Mn(1)-N(1) <sup>#1</sup>                | 174.20(15) |
| O(3)-Mn(1)-N(4) <sup>#2</sup>                | 173.63(13) | O(3) <sup>#1</sup> -Mn(1)-N(4) <sup>#2</sup> | 89.48(13)  |
| N(1)-Mn(1)-N(4) <sup>#2</sup>                | 93.18(10)  | N(1) <sup>#1</sup> -Mn(1)-N(4) <sup>#2</sup> | 90.78(10)  |
| O(3)-Mn(1)-N(4) <sup>#3</sup>                | 89.48(13)  | O(3) <sup>#1</sup> -Mn(1)-N(4) <sup>#3</sup> | 173.63(13) |
| N(1)-Mn(1)-N(4) <sup>#3</sup>                | 90.78(10)  | N(1) <sup>#1</sup> -Mn(1)-N(4) <sup>#3</sup> | 93.18(10)  |
| N(4) <sup>#2</sup> -Mn(1)-N(4) <sup>#3</sup> | 93.87(17)  |                                              |            |

Symmetry transformations used to generate equivalent atoms:

<sup>#1</sup> -x+2,y,-z+1/2; <sup>#2</sup> -x+3/2,-y+1/2,-z; <sup>#3</sup> x+1/2,-y+1/2,z+1/2.

**Table S6.** Selected bond distances (Å) and angles (°) for **6**.

|                               |           |                               |           |
|-------------------------------|-----------|-------------------------------|-----------|
| Co(1)-N(1)                    | 2.142(3)  | Co(1)-N(1) <sup>#1</sup>      | 2.142(3)  |
| Co(1)-N(4) <sup>#2</sup>      | 2.144(3)  | Co(1)-N(4) <sup>#3</sup>      | 2.144(3)  |
| Co(1)-O(7) <sup>#1</sup>      | 2.150(3)  | Co(1)-O(7)                    | 2.150(3)  |
| N(1)-Co(1)-N(1) <sup>#1</sup> | 95.26(17) | N(1)-Co(1)-N(4) <sup>#2</sup> | 92.96(11) |

|                                              |            |                                              |            |
|----------------------------------------------|------------|----------------------------------------------|------------|
| N(1) <sup>#1</sup> -Co(1)-N(4) <sup>#2</sup> | 92.49(11)  | N(1)-Co(1)-N(4) <sup>#3</sup>                | 92.49(11)  |
| N(1) <sup>#1</sup> -Co(1)-N(4) <sup>#3</sup> | 92.96(11)  | N(4) <sup>#2</sup> -Co(1)-N(4) <sup>#3</sup> | 171.92(17) |
| N(1)-Co(1)-O(7) <sup>#1</sup>                | 173.55(12) | N(1) <sup>#1</sup> -Co(1)-O(7) <sup>#1</sup> | 90.74(12)  |
| N(4) <sup>#2</sup> -Co(1)-O(7) <sup>#1</sup> | 84.38(12)  | N(4) <sup>#3</sup> -Co(1)-O(7) <sup>#1</sup> | 89.58(12)  |
| N(1)-Co(1)-O(7)                              | 90.74(12)  | N(1) <sup>#1</sup> -Co(1)-O(7)               | 173.55(12) |
| N(4) <sup>#2</sup> -Co(1)-O(7)               | 89.58(12)  | N(4) <sup>#3</sup> -Co(1)-O(7)               | 84.38(12)  |
| O(7) <sup>#1</sup> -Co(1)-O(7)               | 83.37(18)  |                                              |            |

Symmetry transformations used to generate equivalent atoms:

<sup>#1</sup> -x+1,y,-z+1/2; <sup>#2</sup> x+1/2,-y+1/2,z+1/2; <sup>#3</sup> -x+1/2,-y+1/2,-z.

**Table S7a.** Selected bond distances (Å) and angles (°) for **7**.

|                                              |            |                                              |            |
|----------------------------------------------|------------|----------------------------------------------|------------|
| Zn(1)-O(3) <sup>#1</sup>                     | 1.9724(19) | Zn(1)-O(3)                                   | 1.9724(19) |
| Zn(1)-N(4) <sup>#1</sup>                     | 2.034(3)   | Zn(1)-N(4)                                   | 2.034(3)   |
| Zn(2)-N(1)                                   | 2.121(3)   | Zn(2)-N(1) <sup>#1</sup>                     | 2.121(3)   |
| Zn(2)-O(6) <sup>#1</sup>                     | 2.122(2)   | Zn(2)-O(6)                                   | 2.122(2)   |
| Zn(2)-O(5) <sup>#1</sup>                     | 2.144(2)   | Zn(2)-O(5)                                   | 2.144(2)   |
| O(3) <sup>#1</sup> -Zn(1)-O(3)               | 120.02(12) | O(3) <sup>#1</sup> -Zn(1)-N(4) <sup>#1</sup> | 110.67(9)  |
| O(3)-Zn(1)-N(4) <sup>#1</sup>                | 106.78(9)  | O(3) <sup>#1</sup> -Zn(1)-N(4)               | 106.78(9)  |
| O(3)-Zn(1)-N(4)                              | 110.67(9)  | N(4) <sup>#1</sup> -Zn(1)-N(4)               | 100.15(14) |
| N(1)-Zn(2)-N(1) <sup>#1</sup>                | 92.68(14)  | N(1)-Zn(2)-O(6) <sup>#1</sup>                | 178.07(9)  |
| N(1) <sup>#1</sup> -Zn(2)-O(6) <sup>#1</sup> | 89.23(9)   | N(1)-Zn(2)-O(6)                              | 89.23(9)   |
| N(1) <sup>#1</sup> -Zn(2)-O(6)               | 178.07(10) | O(6) <sup>#1</sup> -Zn(2)-O(6)               | 88.86(13)  |
| N(1)-Zn(2)-O(5) <sup>#1</sup>                | 90.56(10)  | N(1) <sup>#1</sup> -Zn(2)-O(5) <sup>#1</sup> | 93.04(10)  |
| O(6) <sup>#1</sup> -Zn(2)-O(5) <sup>#1</sup> | 89.02(10)  | O(6)-Zn(2)-O(5) <sup>#1</sup>                | 87.26(10)  |
| N(1)-Zn(2)-O(5)                              | 93.04(10)  | N(1) <sup>#1</sup> -Zn(2)-O(5)               | 90.56(10)  |
| O(6) <sup>#1</sup> -Zn(2)-O(5)               | 87.26(10)  | O(6)-Zn(2)-O(5)                              | 89.02(10)  |
| O(5) <sup>#1</sup> -Zn(2)-O(5)               | 174.79(14) |                                              |            |

Symmetry transformations used to generate equivalent atoms:

<sup>#1</sup> -x-1,y,-z+1/2.

**Table S7b.** Hydrogen bonds for **7** (Å and °).

| D-H···A           | d(D-H) | d(H···A) | d(D···A) | <(DHA) |
|-------------------|--------|----------|----------|--------|
| O(6)-H(6A)···O3#1 | 0.82   | 2.41     | 2.810(3) | 111.2  |

Symmetry transformations used to generate equivalent atoms:

<sup>#1</sup> -x-1,y,-z+1/2.

**Table S8.** Selected bond distances (Å) and angles (°) for **8**.

|                          |          |                          |          |
|--------------------------|----------|--------------------------|----------|
| Cd(1)-N(8)               | 2.308(2) | Cd(1)-N(5) <sup>#1</sup> | 2.338(3) |
| Cd(1)-N(5)               | 2.346(3) | Cd(1)-N(1)               | 2.356(2) |
| Cd(1)-N(4) <sup>#2</sup> | 2.366(3) | Cd(1)-N(8) <sup>#3</sup> | 2.436(3) |

|                                              |            |                                              |           |
|----------------------------------------------|------------|----------------------------------------------|-----------|
| N(8)-Cd(1)-N(5) <sup>#1</sup>                | 106.78(10) | N(8)-Cd(1)-N(5)                              | 94.83(10) |
| N(5) <sup>#1</sup> -Cd(1)-N(5)               | 76.62(11)  | N(8)-Cd(1)-N(1)                              | 158.39(9) |
| N(5) <sup>#1</sup> -Cd(1)-N(1)               | 94.82(10)  | N(5)-Cd(1)-N(1)                              | 89.71(10) |
| N(8)-Cd(1)-N(4) <sup>#2</sup>                | 90.13(10)  | N(5) <sup>#1</sup> -Cd(1)-N(4) <sup>#2</sup> | 92.96(9)  |
| N(5)-Cd(1)-N(4) <sup>#2</sup>                | 169.38(9)  | N(1)-Cd(1)-N(4) <sup>#2</sup>                | 89.09(9)  |
| N(8)-Cd(1)-N(8) <sup>#3</sup>                | 76.69(10)  | N(5) <sup>#1</sup> -Cd(1)-N(8) <sup>#3</sup> | 171.70(9) |
| N(5)-Cd(1)-N(8) <sup>#3</sup>                | 95.70(9)   | N(1)-Cd(1)-N(8) <sup>#3</sup>                | 81.85(8)  |
| N(4) <sup>#2</sup> -Cd(1)-N(8) <sup>#3</sup> | 94.57(9)   |                                              |           |

Symmetry transformations used to generate equivalent atoms:

<sup>#1</sup> -x+1,-y+1,-z+1; <sup>#2</sup> -x+2,-y+1,-z; <sup>#3</sup> -x+2,-y+1,-z+1.

**Table S9.** Selected bond distances (Å) and angles (°) for **9**.

|                                              |            |                                              |            |
|----------------------------------------------|------------|----------------------------------------------|------------|
| Mn(1)-N(4) <sup>#1</sup>                     | 2.2081(13) | Mn(1)-N(4)                                   | 2.2081(13) |
| Mn(1)-N(3) <sup>#2</sup>                     | 2.2235(13) | Mn(1)-N(3) <sup>#3</sup>                     | 2.2235(13) |
| Mn(1)-N(1)                                   | 2.2515(13) | Mn(1)-N(1) <sup>#1</sup>                     | 2.2515(13) |
| N(4) <sup>#1</sup> -Mn(1)-N(4)               | 180        | N(4) <sup>#1</sup> -Mn(1)-N(3) <sup>#2</sup> | 89.34(5)   |
| N(4)-Mn(1)-N(3) <sup>#2</sup>                | 90.66(5)   | N(4) <sup>#1</sup> -Mn(1)-N(3) <sup>#3</sup> | 90.66(5)   |
| N(4)-Mn(1)-N(3) <sup>#3</sup>                | 89.34(5)   | N(3) <sup>#2</sup> -Mn(1)-N(3) <sup>#3</sup> | 180        |
| N(4) <sup>#1</sup> -Mn(1)-N(1)               | 93.55(5)   | N(4)-Mn(1)-N(1)                              | 86.45(5)   |
| N(3) <sup>#2</sup> -Mn(1)-N(1)               | 89.43(5)   | N(3) <sup>#3</sup> -Mn(1)-N(1)               | 90.57(5)   |
| N(4) <sup>#1</sup> -Mn(1)-N(1) <sup>#1</sup> | 86.45(5)   | N(4)-Mn(1)-N(1) <sup>#1</sup>                | 93.55(5)   |
| N(3) <sup>#2</sup> -Mn(1)-N(1) <sup>#1</sup> | 90.57(5)   | N(3) <sup>#3</sup> -Mn(1)-N(1) <sup>#1</sup> | 89.43(5)   |
| N(1)-Mn(1)-N(1) <sup>#1</sup>                | 180        |                                              |            |

Symmetry transformations used to generate equivalent atoms:

<sup>#1</sup> -x+1,-y+1,-z+1; <sup>#2</sup> x-1/2,y,-z+3/2; <sup>#3</sup> -x+3/2,-y+1,z-1/2.

**Table S10.** Selected bond distances (Å) and angles (°) for **10**.

|                                              |            |                                              |            |
|----------------------------------------------|------------|----------------------------------------------|------------|
| Ni(1)-O(3) <sup>#1</sup>                     | 2.0586(19) | Ni(1)-O(3)                                   | 2.0586(19) |
| Ni(1)-N(4) <sup>#2</sup>                     | 2.100(2)   | Ni(1)-N(4) <sup>#3</sup>                     | 2.100(2)   |
| Ni(1)-N(1)                                   | 2.119(2)   | Ni(1)-N(1) <sup>#1</sup>                     | 2.119(2)   |
| O(3) <sup>#1</sup> -Ni(1)-O(3)               | 180        | O(3) <sup>#1</sup> -Ni(1)-N(4) <sup>#2</sup> | 91.79(9)   |
| O(3)-Ni(1)-N(4) <sup>#2</sup>                | 88.21(9)   | O(3) <sup>#1</sup> -Ni(1)-N(4) <sup>#3</sup> | 88.21(9)   |
| O(3)-Ni(1)-N(4) <sup>#3</sup>                | 91.79(9)   | N(4) <sup>#2</sup> -Ni(1)-N(4) <sup>#3</sup> | 180        |
| O(3) <sup>#1</sup> -Ni(1)-N(1)               | 94.29(9)   | O(3)-Ni(1)-N(1)                              | 85.71(9)   |
| N(4) <sup>#2</sup> -Ni(1)-N(1)               | 93.60(9)   | N(4) <sup>#3</sup> -Ni(1)-N(1)               | 86.40(9)   |
| O(3) <sup>#1</sup> -Ni(1)-N(1) <sup>#1</sup> | 85.71(9)   | O(3)-Ni(1)-N(1) <sup>#1</sup>                | 94.29(9)   |
| N(4) <sup>#2</sup> -Ni(1)-N(1) <sup>#1</sup> | 86.40(9)   | N(4) <sup>#3</sup> -Ni(1)-N(1) <sup>#1</sup> | 93.60(9)   |
| N(1)-Ni(1)-N(1) <sup>#1</sup>                | 180        |                                              |            |

Symmetry transformations used to generate equivalent atoms:

<sup>#1</sup> -x+1,-y,-z+2; <sup>#2</sup> x+1/2,-y-1/2,z+1/2; <sup>#3</sup> -x+1/2,y+1/2,-z+3/2.

**Table S11.** Selected bond distances (Å) and angles (°) for **11**.

|                                              |            |                                              |            |
|----------------------------------------------|------------|----------------------------------------------|------------|
| Cd(1)-O(3)                                   | 2.240(3)   | Cd(1)-N(1)                                   | 2.257(3)   |
| Cd(1)-O(2)                                   | 2.316(3)   | Cd(1)-O(5) <sup>#1</sup>                     | 2.363(3)   |
| Cd(1)-O(6) <sup>#1</sup>                     | 2.388(3)   | Cd(1)-O(3) <sup>#2</sup>                     | 2.458(3)   |
| O(3)-Cd(1)-N(1)                              | 124.79(11) | O(3)-Cd(1)-O(2)                              | 95.50(11)  |
| N(1)-Cd(1)-O(2)                              | 90.91(12)  | O(3)-Cd(1)-O(5) <sup>#1</sup>                | 142.08(9)  |
| N(1)-Cd(1)-O(5) <sup>#1</sup>                | 91.32(11)  | O(2)-Cd(1)-O(5) <sup>#1</sup>                | 94.99(11)  |
| O(3)-Cd(1)-O(6) <sup>#1</sup>                | 87.61(9)   | N(1)-Cd(1)-O(6) <sup>#1</sup>                | 146.28(10) |
| O(2)-Cd(1)-O(6) <sup>#1</sup>                | 95.32(10)  | O(5) <sup>#1</sup> -Cd(1)-O(6) <sup>#1</sup> | 55.17(9)   |
| O(3)-Cd(1)-O(3) <sup>#2</sup>                | 81.66(9)   | N(1)-Cd(1)-O(3) <sup>#2</sup>                | 89.32(10)  |
| O(2)-Cd(1)-O(3) <sup>#2</sup>                | 176.68(9)  | O(5) <sup>#1</sup> -Cd(1)-O(3) <sup>#2</sup> | 88.32(9)   |
| O(6) <sup>#1</sup> -Cd(1)-O(3) <sup>#2</sup> | 86.31(9)   |                                              |            |

Symmetry transformations used to generate equivalent atoms:

<sup>#1</sup>  $x-1/2, y-1/2, z$ ; <sup>#2</sup>  $-x, -y-1, -z+1$ .

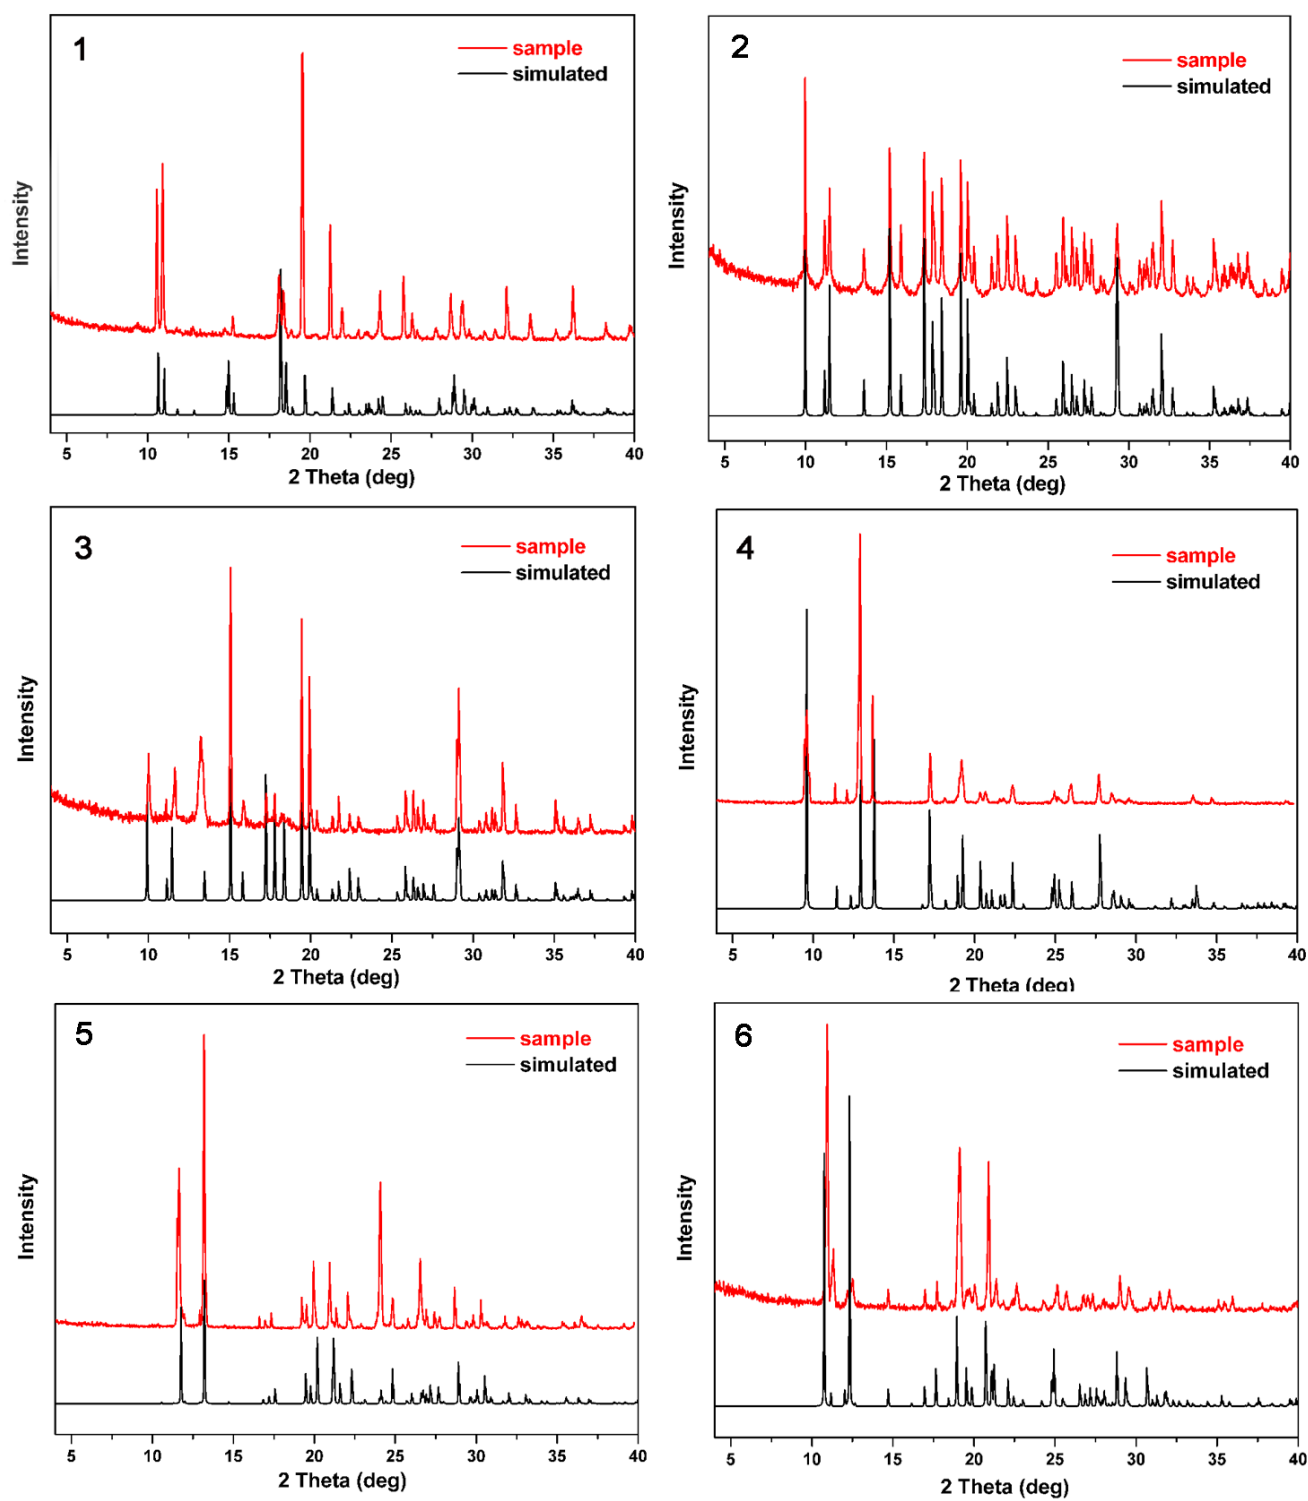

**Fig. S1** Simulated (black) and experimental (red) PXRD patterns of compounds **1-6**.

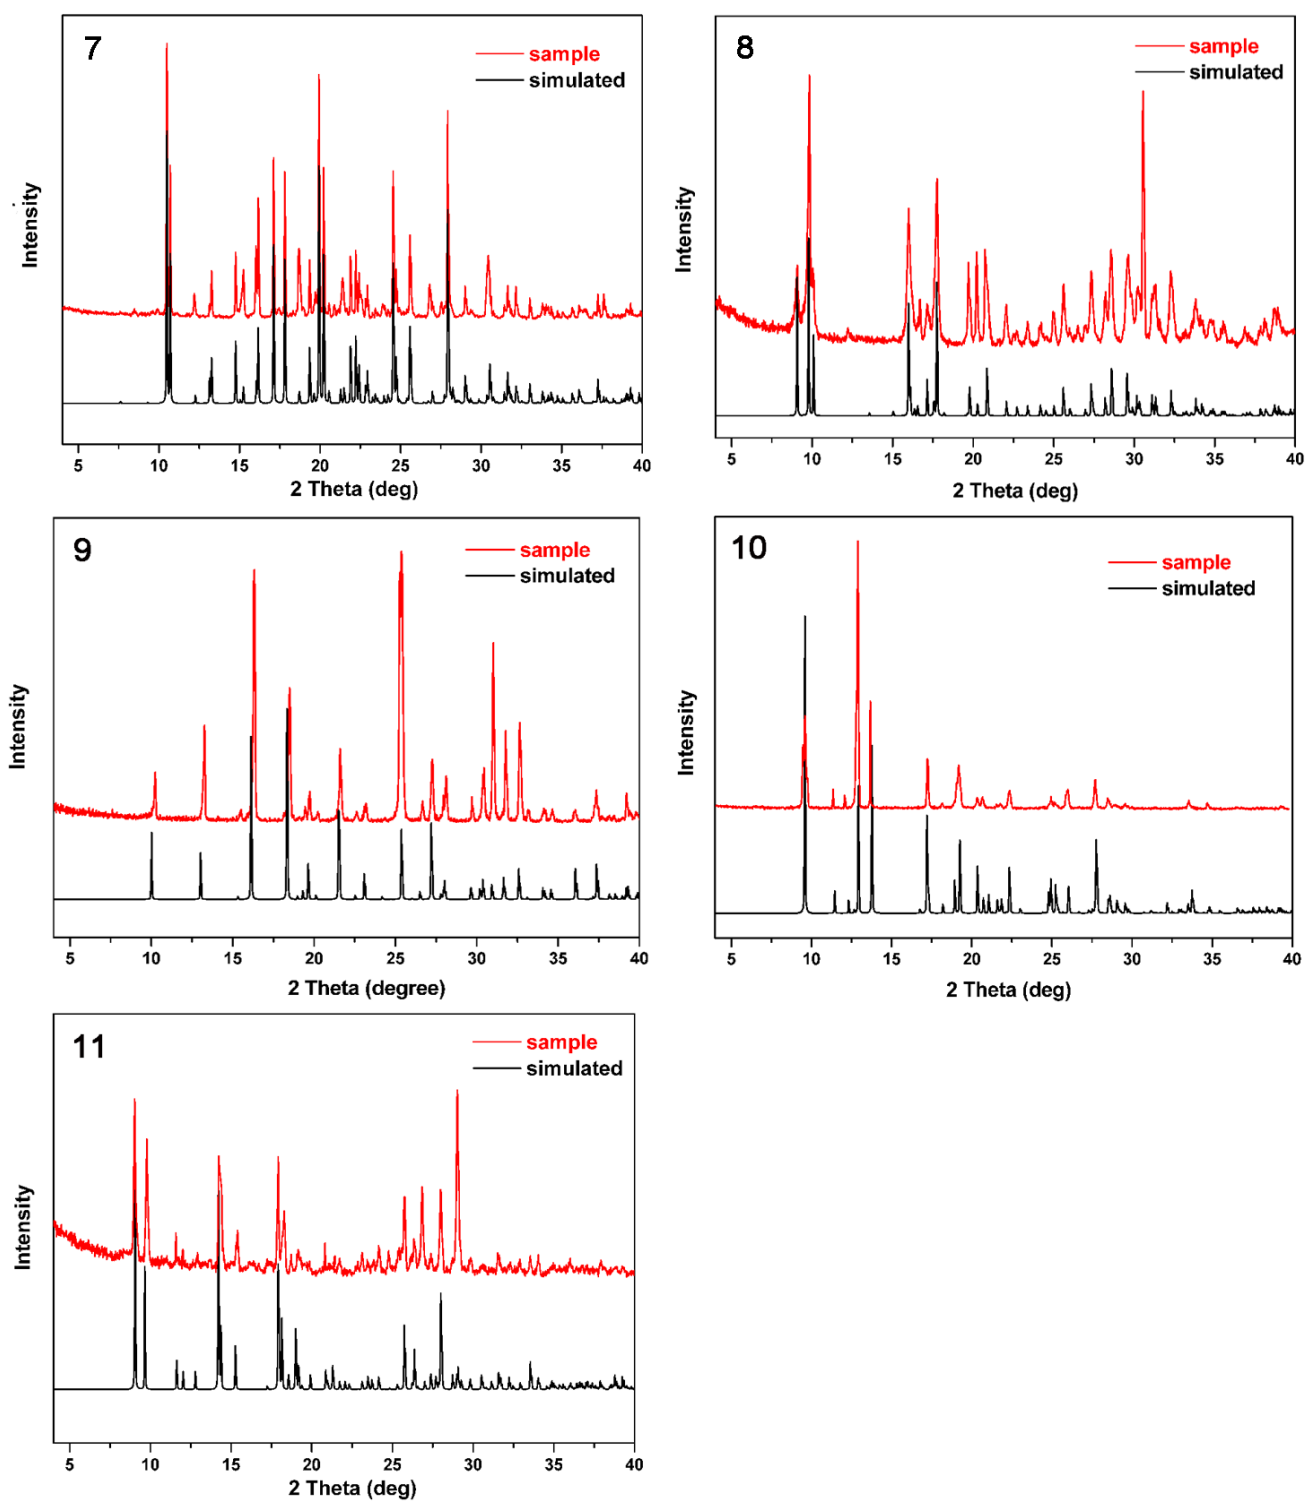

**Fig. S2** Simulated (black) and experimental (red) PXRD patterns of compounds 7-11.



Thermogravimetric (TGA) experiments were carried out to study the thermal stability of **1-11** (Fig. S3 and Fig. S4). The TG curves of **1**, **5** and **6** exhibited two steps of weight losses of 4.53% (30-130°C) and 50.22% (170-500°C) (**1**), or 5.19% (30-185°C) and 60.15% (200-500°C) (**5**), or 4.59% (30-115°C) and 63.01% (170-500°C) (**6**), which corresponded to the loss of the coordinated water molecules and the sdi ligands, respectively. The remaining weight corresponds to the formation of ZnO for **1** (obsd 21.27%, calcd 20.06%), MnO for **5** (obsd 11.88%, calcd 11.60%) and Co<sub>2</sub>O<sub>3</sub> for **6** (obsd 14.14%, calcd 12.01%). Thermal analysis of **2** showed that the weight is almost unchanged in the temperature range of 30-130 °C. Above 130 °C, the residue begins to decompose. The residue corresponds to the formation of ZnO (obsd 14.16%, calcd 13.89%). Compound **3** has similar thermodynamic properties to those of **2**, and compound **3** is stable up to 155 °C. The remaining residue corresponding to the formation of Co<sub>2</sub>O<sub>3</sub> is 14.90% (calcd 14.31%). The TG curve of **4** showed two steps of weight losses of 6.41% (30-190°C) and 56.87% (200-350 °C), which could be assigned to the loss of the free acetone molecules and the sdi ligands, respectively. The remaining residue corresponds to the formation of CuO (obsd 11.66%, calcd 11.36%). Compounds **8**, **9** and **10** had similar weight loss stages to that of **2**. Compound **8** released the sdi ligands in the range of 200-500°C with a weight loss of 52.44%, leading to the formation of CdO as the residue (obsd 32.73%, calcd 32.53%). Compound **9** released the sdi ligands in the range of 220-570°C with a weight loss of 61.28%. The departure of the structure leads to the formation of MnO as the residue (obsd 21.68%, calcd 21.04%). Compound **10** released the sdi ligands in the range of 290-520°C with a weight loss of 72.56%. The remaining residue is assigned to the formation of NiO (obsd 13.98%, calcd 13.55%). The TG curves of **7** and **11** displayed three stages of weight losses of 9.82% (30-150°C), 38.62% (180-380°C) and 16.85% (400-600°C) (**7**), or 6.29% (30-180°C), 22.03% (190-310°C) and 46.07% (350-700°C) (**11**), which could be assigned to the loss of the coordinated methanol molecules and water molecules, the sdi ligands, and bdc ligand(**7**) (btc ligand(**11**)), respectively. The remaining weight corresponds to the formation of ZnO for **7** (obsd 16.46%, calcd 15.95%) and CdO for **11** (obsd 28.98%, calcd 28.56%).

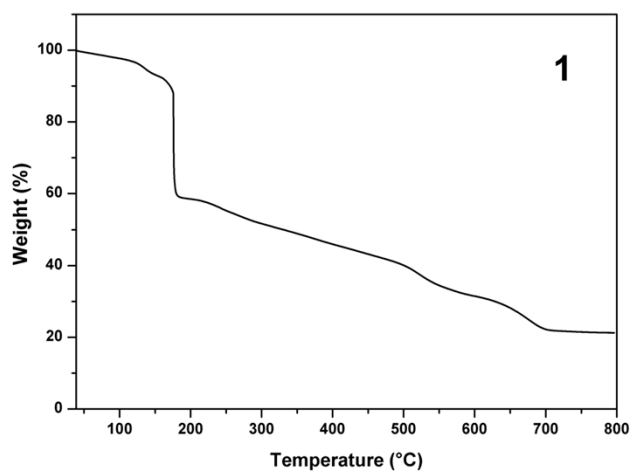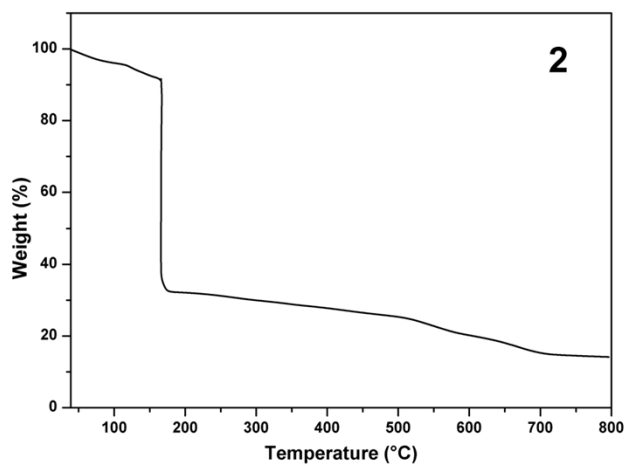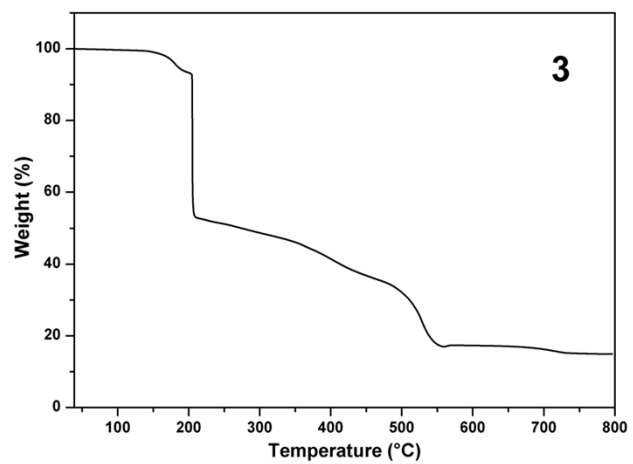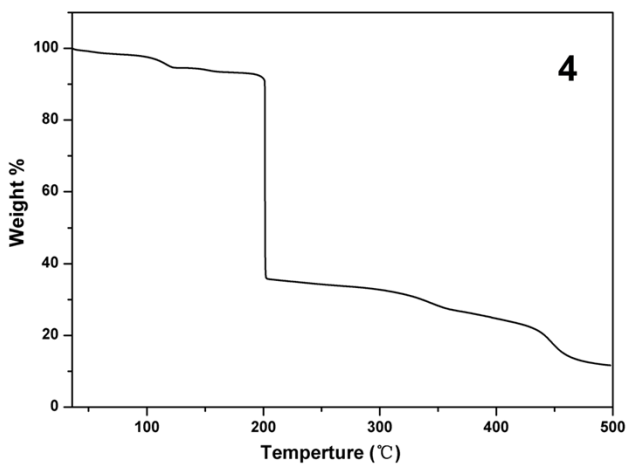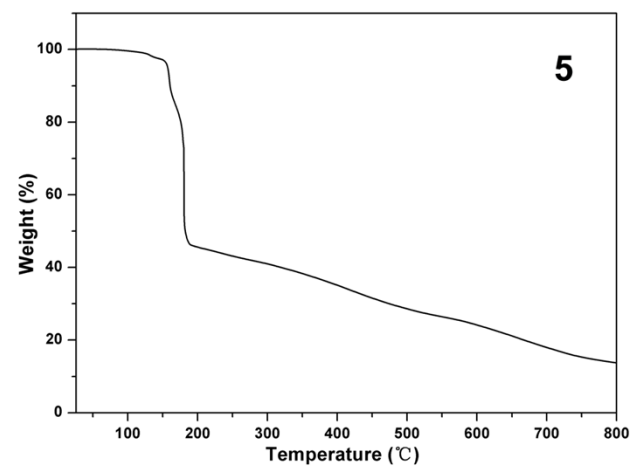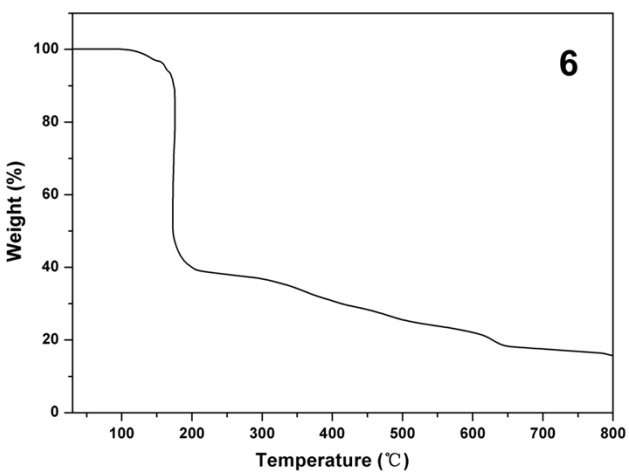

Fig. S3 TGA plot of compounds 1-6.

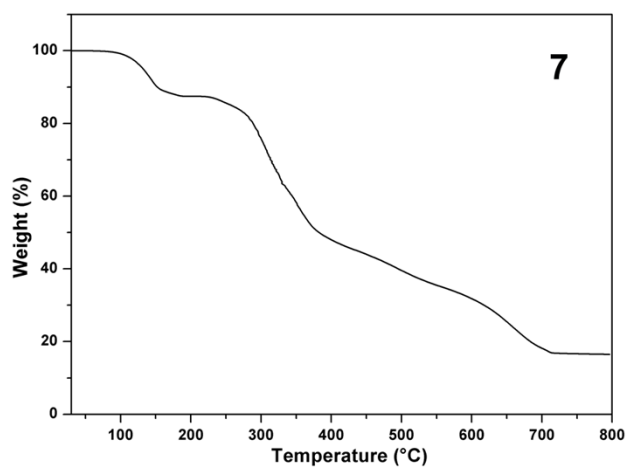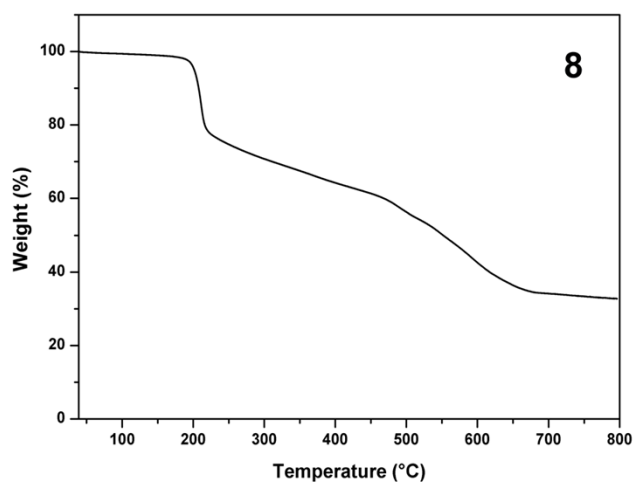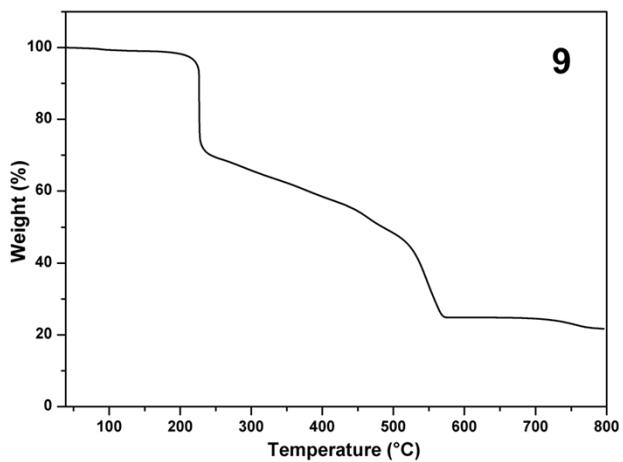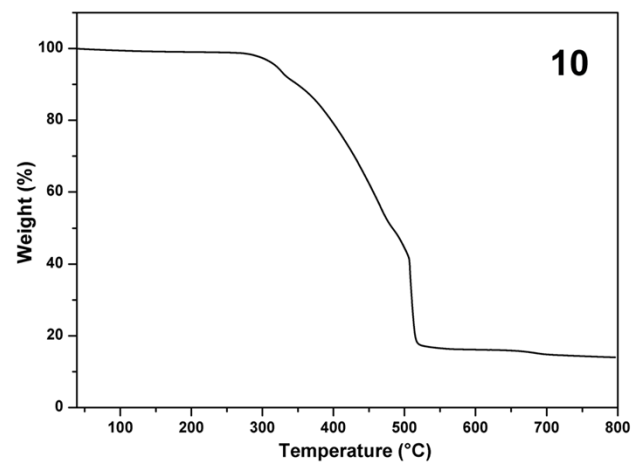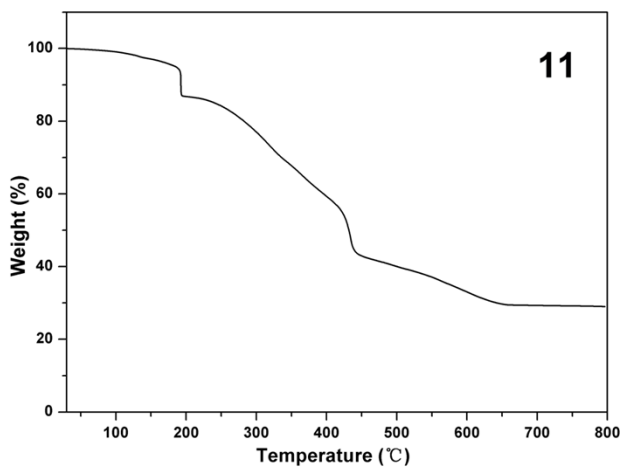

Fig. S4 TGA plot of compounds 7-11.

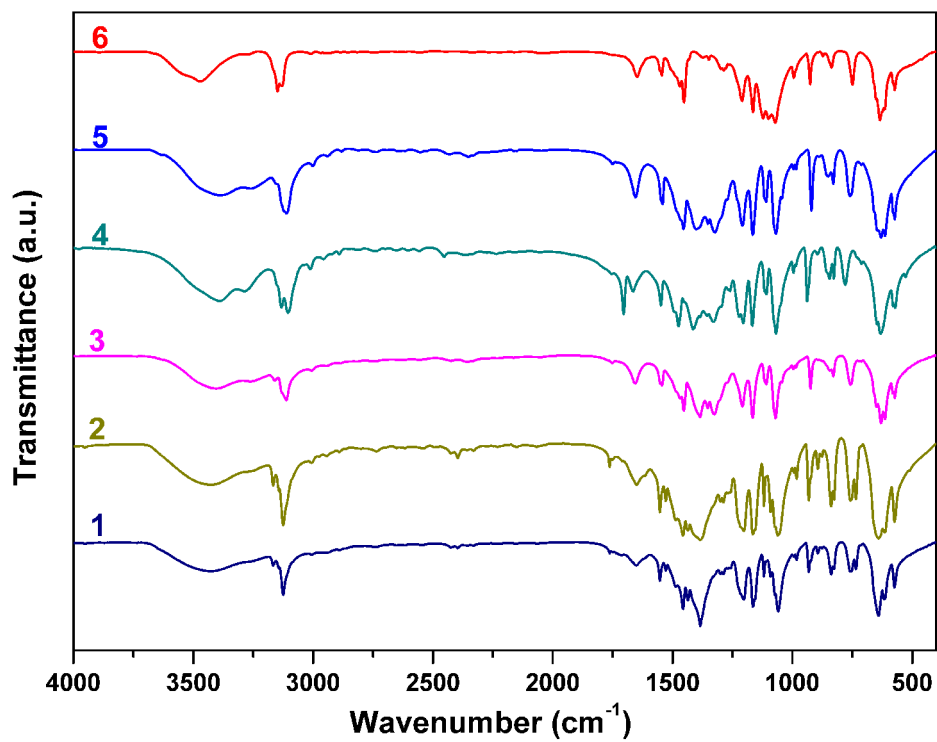

Fig. S5 IR spectra of compounds 1-6.

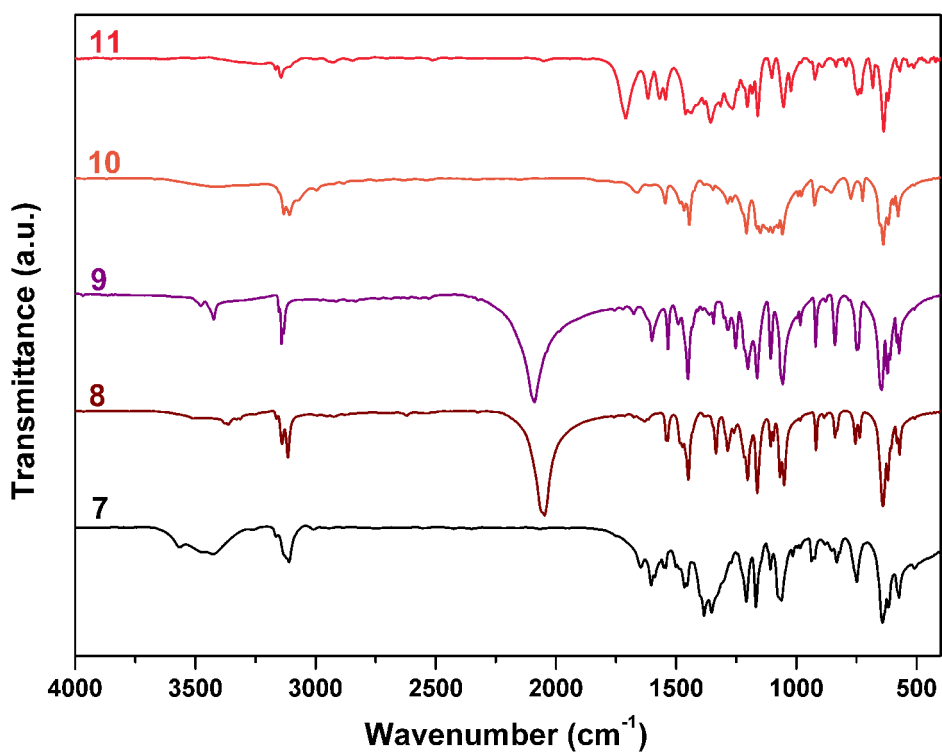

Fig. S6 IR spectra of compounds 7-11.
